# Supplementary material for: COVID-19 Vaccine Hesitancy among New Jersey Teachers and Impacts of Vaccination Information Dissemination
Source: MDPI journal article supplement (doi:10.3390/vaccines11020466), 2023-02-17
Supplement: s1 [file s1]

**Supplemental Table 1: Demographics of Study Sample**

|                                                        | N<br>(n=269) | % of<br>total | %<br>answered |
|--------------------------------------------------------|--------------|---------------|---------------|
| <i>School County region:</i>                           |              |               |               |
| North                                                  | 100          | 37.2%         | 43.7%         |
| Central                                                | 84           | 31.2%         | 36.7%         |
| South                                                  | 45           | 16.7%         | 19.7%         |
| Missing                                                | 40           | 14.9%         |               |
| <i>Race and Ethnicity:</i>                             |              |               |               |
| <i>American Indian or Alaskan Native</i>               | 1            | 0.4%          | 0.4%          |
| <i>Native Hawaiian or Other Asian-Pacific Islander</i> | 0            | 0.0%          | 0.0%          |
| <i>Middle Eastern/North African</i>                    | 2            | 0.7%          | 0.9%          |
| <i>Hispanic Asian</i>                                  | 1            | 0.4%          | 0.4%          |
| <i>Hispanic Black</i>                                  | 4            | 1.5%          | 1.7%          |
| <i>Hispanic White</i>                                  | 17           | 6.3%          | 7.4%          |
| <i>Non-Hispanic Asian</i>                              | 3            | 1.1%          | 1.3%          |
| <i>Non-Hispanic Black</i>                              | 10           | 3.7%          | 4.4%          |
| <i>Non-Hispanic White</i>                              | 175          | 65.1%         | 76.4%         |
| <i>I prefer not to answer this question</i>            | 13           | 4.8%          | 5.7%          |
| <i>Other</i>                                           | 9            | 3.3%          | 3.9%          |
| Missing                                                | 40           | 14.9%         |               |
| <i>Gender</i>                                          |              |               |               |
| Male                                                   | 72           | 26.8%         | 31.4%         |
| Female                                                 | 148          | 55.0%         | 64.6%         |
| Other/Multigender                                      | 3            | 1.1%          | 1.3%          |
| I prefer not to answer                                 | 4            | 1.5%          | 1.7%          |
| missing                                                | 40           | 14.9%         |               |
| <b>Birth Year</b>                                      | 1976±9.6     |               |               |
| Pre 1950-1959                                          | 11           | 4.1%          | 4.8%          |
| 1960-1969                                              | 49           | 18.2%         | 21.5%         |
| 1970-1979                                              | 81           | 30.1%         | 35.5%         |
| 1980-1989                                              | 70           | 26.0%         | 30.7%         |
| 1990-2000                                              | 17           | 6.3%          | 7.5%          |
| missing                                                | 41           | 15.2%         |               |
| <b>Number of Years Teaching in NJ</b>                  | 15.4±7.1     |               |               |
| <b>Number of Years of Teaching Overall</b>             | 16.2±7.4     |               |               |
| <i>What is the highest education degree completed?</i> |              |               |               |
| Bachelor's degree                                      | 59           | 21.9%         | 25.8%         |
| Master's degree                                        | 146          | 54.3%         | 63.8%         |
| Doctoral degree                                        | 6            | 2.2%          | 2.6%          |
| Other                                                  | 18           | 6.7%          | 7.9%          |
| Missing/NA/IPNA                                        | 40           | 14.9%         |               |

---

|                                                                                    |         |  |  |
|------------------------------------------------------------------------------------|---------|--|--|
| How many years of post-secondary education (after high school) have you completed? | 6.4±2.6 |  |  |
|------------------------------------------------------------------------------------|---------|--|--|

Note: IPNA is “I prefer not to answer”

**Supplemental Table 2.** COVID-19 Education Information by stratification among the NJ secondary or high school teachers.

| <i>COVID-19 Vaccination Status</i>                                         | <i>Vaccinated (n=215)</i> | <i>%</i> | <i>Unvaccinated or IPNA (n=18)</i> | <i>%</i> | <i>Fisher's</i> | <i>Total</i> | <i>%</i> |
|----------------------------------------------------------------------------|---------------------------|----------|------------------------------------|----------|-----------------|--------------|----------|
| Do you know where to get accurate information about the COVID-19 vaccines? |                           |          |                                    |          |                 |              |          |
| Yes                                                                        | 187                       | 87.0%    | 15                                 | 83.3%    | 0.45            | 202          | 86.7%    |
| No                                                                         | 11                        | 5.1%     | 2                                  | 11.1%    |                 | 13           | 5.6%     |
| Not sure                                                                   | 17                        | 7.9%     | 1                                  | 5.6%     |                 | 18           | 7.7%     |
| Do you currently have a Primary care provider?                             |                           |          |                                    |          |                 |              |          |
| Yes                                                                        | 197                       | 91.6%    | 15                                 | 83.3%    | 0.28            | 212          | 91.0%    |
| No                                                                         | 15                        | 7.0%     | 3                                  | 16.7%    |                 | 18           | 7.7%     |
| Do you have any of the following conditions? [Check all that apply]        |                           |          |                                    |          |                 |              |          |
| Immunocompromised                                                          | 11                        | 5.1%     | 0                                  | 0.0%     | 1.00            | 11           | 4.7%     |
| Obesity                                                                    | 31                        | 14.4%    | 2                                  | 11.1%    | 1.00            | 33           | 14.2%    |
| Diabetes (type 1 or 2)                                                     | 10                        | 4.7%     | 1                                  | 5.6%     | 0.60            | 11           | 4.7%     |
| Cardiovascular disease                                                     | 10                        | 4.7%     | 0                                  | 0.0%     | 1.00            | 10           | 4.3%     |
| Pulmonary disease                                                          | 2                         | 0.9%     | 1                                  | 5.6%     | 0.22            | 3            | 1.3%     |
| How likely are you to recommend getting the COVID-19 vaccine?              |                           |          |                                    |          |                 |              |          |
| Not at all likely                                                          | 31                        | 14.4%    | 16                                 | 88.9%    | <0.001***       | 47           | 20.2%    |
| Somewhat likely                                                            | 60                        | 27.9%    | 1                                  | 5.6%     |                 | 61           | 26.2%    |
| Extremely likely                                                           | 116                       | 54.0%    | 0                                  | 0.0%     |                 | 116          | 49.8%    |

| <i>Booster Status</i>                                                      | <i>Booster taken (n=167)</i> | <i>%</i> | <i>No Booster (n=48)</i> | <i>%</i> | <i>Fisher's</i> | <i>Total</i> | <i>%</i> |
|----------------------------------------------------------------------------|------------------------------|----------|--------------------------|----------|-----------------|--------------|----------|
| Do you know where to get accurate information about the COVID-19 vaccines? |                              |          |                          |          |                 |              |          |
| Yes                                                                        | 148                          | 88.6%    | 39                       | 81.3%    | 0.32            | 187          | 87.0%    |
| No                                                                         | 8                            | 4.8%     | 3                        | 6.3%     |                 | 11           | 5.1%     |
| Not sure                                                                   | 11                           | 6.6%     | 6                        | 12.5%    |                 | 17           | 7.9%     |
| Do you currently have a Primary care provider?                             |                              |          |                          |          |                 |              |          |
| Yes                                                                        | 151                          | 90.4%    | 46                       | 95.8%    | 0.72            | 197          | 91.6%    |
| No                                                                         | 13                           | 7.8%     | 2                        | 4.2%     |                 | 15           | 7.0%     |
| Do you have any of the following conditions? [Check all that apply]        |                              |          |                          |          |                 |              |          |

|                                                               |     |       |    |       |           |     |       |
|---------------------------------------------------------------|-----|-------|----|-------|-----------|-----|-------|
| Immunocompromised                                             | 9   | 5.4%  | 2  | 4.2%  | 1.00      | 11  | 5.1%  |
| Obesity                                                       | 24  | 14.4% | 7  | 14.6% | 1.00      | 31  | 14.4% |
| Diabetes (type 1 or 2)                                        | 10  | 6.0%  | 0  | 0.0%  | 0.12      | 10  | 4.7%  |
| Cardiovascular disease                                        | 9   | 5.4%  | 1  | 2.1%  | 0.46      | 10  | 4.7%  |
| How likely are you to recommend getting the COVID-19 vaccine? |     |       |    |       |           |     |       |
| Not at all likely                                             | 12  | 7.2%  | 19 | 39.6% | <0.001*** | 31  | 14.4% |
| Somewhat likely                                               | 43  | 25.7% | 17 | 35.4% |           | 60  | 27.9% |
| Extremely likely                                              | 106 | 63.5% | 10 | 20.8% |           | 116 | 54.0% |

| <i>COVID Diagnosis Status</i>                                              | <i>Positive diagnosis (n=106)</i> |       | <i>No Positive diagnosis (n=124)</i> |       | <i>Fisher's</i> | <i>Total</i> | <i>%</i> |
|----------------------------------------------------------------------------|-----------------------------------|-------|--------------------------------------|-------|-----------------|--------------|----------|
| Do you know where to get accurate information about the COVID-19 vaccines? |                                   |       |                                      |       |                 |              |          |
| Yes                                                                        | 89                                | 84.0% | 100                                  | 81.0% | 0.40            | 189          | 82.0%    |
| No                                                                         | 6                                 | 6.0%  | 7                                    | 6.0%  |                 | 13           | 6.0%     |
| Not sure                                                                   | 11                                | 10.0% | 7                                    | 6.0%  |                 | 18           | 8.0%     |
| Do you currently have a Primary care provider?                             |                                   |       |                                      |       |                 |              |          |
| Yes                                                                        | 94                                | 89.0% | 115                                  | 93.0% | 0.18            | 209          | 91.0%    |
| No                                                                         | 11                                | 10.0% | 7                                    | 6.0%  |                 | 18           | 8.0%     |
| Do you have any of the following conditions? [Check all that apply]        |                                   |       |                                      |       |                 |              |          |
| Immunocompromised                                                          | 4                                 | 3.8%  | 7                                    | 5.6%  | 0.55            | 11           | 4.8%     |
| Obesity                                                                    | 15                                | 14.2% | 18                                   | 14.5% | 1.00            | 33           | 14.3%    |
| Diabetes (type 1 or 2)                                                     | 3                                 | 2.8%  | 8                                    | 6.5%  | 0.23            | 11           | 4.8%     |
| Cardiovascular disease                                                     | 8                                 | 7.5%  | 2                                    | 1.6%  | 0.05*           | 10           | 4.3%     |
| How likely are you to recommend getting the COVID-19 vaccine?              |                                   |       |                                      |       |                 |              |          |
| Not at all likely                                                          | 34                                | 32.1% | 13                                   | 10.5% | <0.001***       | 47           | 20.4%    |
| Somewhat likely                                                            | 26                                | 24.5% | 34                                   | 27.4% |                 | 60           | 26.1%    |
| Extremely likely                                                           | 42                                | 39.6% | 73                                   | 58.9% |                 | 115          | 50.0%    |

| <i>Gender</i> | <i>Female (n=147)</i> | <i>%</i> | <i>Male (n=72)</i> | <i>%</i> | <i>Fisher's</i> | <i>Total</i> | <i>%</i> |
|---------------|-----------------------|----------|--------------------|----------|-----------------|--------------|----------|
|---------------|-----------------------|----------|--------------------|----------|-----------------|--------------|----------|

| Do you know where to get accurate information about the COVID-19 vaccines? |     |       |    |       |           |     |       |
|----------------------------------------------------------------------------|-----|-------|----|-------|-----------|-----|-------|
| Yes                                                                        | 128 | 87.1% | 62 | 86.1% | 0.37      | 190 | 86.8% |
| No                                                                         | 7   | 4.8%  | 6  | 8.3%  |           | 13  | 5.9%  |
| Do you currently have a primary care provider?                             |     |       |    |       |           |     |       |
| Yes                                                                        | 135 | 91.8% | 64 | 88.9% | 0.79      | 199 | 90.9% |
| No                                                                         | 11  | 7.5%  | 6  | 8.3%  |           | 17  | 7.8%  |
| Do you have any of the following conditions? [Check all that apply]        |     |       |    |       |           |     |       |
| Immunocompromised                                                          | 5   | 3.4%  | 5  | 6.9%  | 0.30      | 10  | 4.6%  |
| Obesity                                                                    | 16  | 10.9% | 16 | 22.2% | 0.04*     | 32  | 14.6% |
| Diabetes                                                                   | 1   | 0.7%  | 10 | 13.9% | <0.001*** | 11  | 5.0%  |
| Cardiovascular disease                                                     | 7   | 4.8%  | 3  | 4.2%  | 1.00      | 10  | 4.6%  |
| How likely are you to recommend getting the COVID-19 vaccine to others?    |     |       |    |       |           |     |       |
| Not at all likely                                                          | 31  | 21.1% | 11 | 15.3% | 0.55      | 42  | 19.2% |
| Somewhat likely                                                            | 36  | 24.5% | 20 | 27.8% |           | 56  | 25.6% |
| Extremely likely                                                           | 74  | 50.3% | 40 | 55.6% |           | 114 | 52.1% |

| <i>Race</i>                                                                | <i>Non-Hispanic White (n=191)</i> | <i>%</i> | <i>Other (n=22)</i> | <i>%</i> | <i>Fisher's</i> | <i>Total</i> | <i>%</i> |
|----------------------------------------------------------------------------|-----------------------------------|----------|---------------------|----------|-----------------|--------------|----------|
| Do you know where to get accurate information about the COVID-19 vaccines? |                                   |          |                     |          |                 |              |          |
| Yes                                                                        | 165                               | 86.4%    | 20                  | 90.9%    | 1.00            | 185          | 86.9%    |
| No                                                                         | 11                                | 5.8%     | 1                   | 4.5%     |                 | 12           | 5.6%     |
| Do you currently have a primary care provider?                             |                                   |          |                     |          |                 |              |          |
| Yes                                                                        | 174                               | 91.1%    | 21                  | 95.5%    | 0.38            | 195          | 91.5%    |
| No                                                                         | 16                                | 8.4%     | 0                   | 0.0%     |                 | 16           | 7.5%     |
| Do you have any of the following conditions? [Check all that apply]        |                                   |          |                     |          |                 |              |          |
| Immunocompromised                                                          | 9                                 | 4.7%     | 1                   | 4.5%     | 1.00            | 10           | 4.7%     |
| Obesity                                                                    | 27                                | 14.1%    | 5                   | 22.7%    | 0.34            | 32           | 15.0%    |
| Diabetes                                                                   | 11                                | 5.8%     | 0                   | 0.0%     | 0.61            | 11           | 5.2%     |
| Cardiovascular disease                                                     | 9                                 | 4.7%     | 1                   | 4.5%     | 1.00            | 10           | 4.7%     |

| How likely are you to recommend getting the COVID-19 vaccine to others? |     |       |    |       |      |     |       |
|-------------------------------------------------------------------------|-----|-------|----|-------|------|-----|-------|
| Not at all likely                                                       | 35  | 18.3% | 6  | 27.3% | 0.54 | 41  | 19.2% |
| Somewhat likely                                                         | 50  | 26.2% | 4  | 18.2% |      | 54  | 25.4% |
| Extremely likely                                                        | 100 | 52.4% | 12 | 54.5% |      | 112 | 52.6% |

| <i>County</i>                                                              | <i>Cumberland and Ocean (n=24)</i> | <i>%</i> | <i>Other Counties (n=205)</i> | <i>%</i> | <i>Fisher's</i> | <i>Total</i> | <i>%</i> |
|----------------------------------------------------------------------------|------------------------------------|----------|-------------------------------|----------|-----------------|--------------|----------|
| Do you know where to get accurate information about the COVID-19 vaccines? |                                    |          |                               |          |                 |              |          |
| Yes                                                                        | 20                                 | 83.3%    | 178                           | 86.8%    | 0.63            | 198          | 86.5%    |
| No                                                                         | 2                                  | 8.3%     | 11                            | 5.4%     |                 | 13           | 5.7%     |
| Do you currently have a primary care provider?                             |                                    |          |                               |          |                 |              |          |
| Yes                                                                        | 20                                 | 83.3%    | 188                           | 91.7%    | 0.11            | 208          | 90.8%    |
| No                                                                         | 4                                  | 16.7%    | 14                            | 6.8%     |                 | 18           | 7.9%     |
| Do you have any of the following conditions? [Check all that apply]        |                                    |          |                               |          |                 |              |          |
| Cancer                                                                     | 0                                  | 0.0%     | 2                             | 1.0%     | 1.00            | 2            | 0.9%     |
| Immunocompromised                                                          | 2                                  | 8.3%     | 9                             | 4.4%     | 0.32            | 11           | 4.8%     |
| Obesity                                                                    | 2                                  | 8.3%     | 31                            | 15.1%    | 0.54            | 33           | 14.4%    |
| Diabetes                                                                   | 2                                  | 8.3%     | 9                             | 4.4%     | 0.32            | 11           | 4.8%     |
| Cardiovascular disease                                                     | 2                                  | 8.3%     | 8                             | 3.9%     | 0.28            | 10           | 4.4%     |
| Pulmonary disease                                                          | 0                                  | 0.0%     | 3                             | 1.5%     | 1.00            | 3            | 1.3%     |
| Rheumatological condition                                                  | 0                                  | 0.0%     | 1                             | 0.5%     | 1.00            | 1            | 0.4%     |
| How likely are you to recommend getting the COVID-19 vaccine to others?    |                                    |          |                               |          |                 |              |          |
| Not at all likely                                                          | 5                                  | 20.8%    | 39                            | 19.0%    | 0.74            | 44           | 19.2%    |
| Somewhat likely                                                            | 8                                  | 33.3%    | 52                            | 25.4%    |                 | 60           | 26.2%    |
| Extremely likely                                                           | 11                                 | 45.8%    | 105                           | 51.2%    |                 | 116          | 50.7%    |

---

Note: IPNA is "I prefer not to answer" \* $p < 0.05$ , \*\*  $p < 0.01$ , \*\*\* $p < 0.001$

**Supplemental Table 3.** COVID-19 safety practice information related to social distancing by stratification among the NJ secondary or high school teachers.

| <i>COVID Diagnosis Status<sup>a</sup></i>                                                                                           | <i>Positive diagnosis (n=106)</i> | <i>%</i> | <i>No Positive diagnosis (n=124)</i> | <i>%</i> | <i>Fisher's</i> | <i>Total</i> | <i>%</i> |
|-------------------------------------------------------------------------------------------------------------------------------------|-----------------------------------|----------|--------------------------------------|----------|-----------------|--------------|----------|
| How likely are you to maintain at least 6 feet distance from people who do not live in your home while in public spaces?            |                                   |          |                                      |          |                 |              |          |
| Not at all likely                                                                                                                   | 43                                | 40.6%    | 53                                   | 42.7%    | 0.59            | 96           | 41.7%    |
| Somewhat likely                                                                                                                     | 45                                | 42.5%    | 45                                   | 36.3%    |                 | 90           | 39.1%    |
| Extremely likely                                                                                                                    | 18                                | 17.0%    | 26                                   | 21.0%    |                 | 44           | 19.1%    |
| How likely are you to maintain at least 6 feet distance from people who do not live in your home while at small private gatherings? |                                   |          |                                      |          |                 |              |          |
| Not at all likely                                                                                                                   | 64                                | 60.4%    | 57                                   | 46.0%    | 0.12            | 121          | 52.6%    |
| Somewhat likely                                                                                                                     | 30                                | 28.3%    | 44                                   | 35.5%    |                 | 74           | 32.2%    |
| Extremely likely                                                                                                                    | 12                                | 11.3%    | 21                                   | 16.9%    |                 | 33           | 14.3%    |
| How likely are you to maintain at least 6 feet distance from people who do not live in your home while at work?                     |                                   |          |                                      |          |                 |              |          |
| Not at all likely                                                                                                                   | 60                                | 56.6%    | 63                                   | 50.8%    | 0.66            | 123          | 53.5%    |
| Somewhat likely                                                                                                                     | 37                                | 34.9%    | 46                                   | 37.1%    |                 | 83           | 36.1%    |
| Extremely likely                                                                                                                    | 9                                 | 8.5%     | 14                                   | 11.3%    |                 | 23           | 10.0%    |

| <i>COVID-19 Vaccination Status</i>                                                                                                  | <i>Vaccinated (n=215)</i>    | <i>%</i> | <i>Unvaccinated or IPNA (n=18)</i> | <i>%</i> | <i>Fisher's</i> | <i>Total</i> | <i>%</i> |
|-------------------------------------------------------------------------------------------------------------------------------------|------------------------------|----------|------------------------------------|----------|-----------------|--------------|----------|
| How likely are you to maintain at least 6 feet distance from people who do not live in your home while in public spaces?            |                              |          |                                    |          |                 |              |          |
| Not at all likely                                                                                                                   | 88                           | 40.9%    | 10                                 | 55.6%    | 0.31            | 98           | 42.1%    |
| Somewhat likely                                                                                                                     | 86                           | 40.0%    | 4                                  | 22.2%    |                 | 90           | 38.6%    |
| Extremely likely                                                                                                                    | 40                           | 18.6%    | 4                                  | 22.2%    |                 | 44           | 18.9%    |
| How likely are you to maintain at least 6 feet distance from people who do not live in your home while at small private gatherings? |                              |          |                                    |          |                 |              |          |
| Not at all likely                                                                                                                   | 110                          | 51.2%    | 12                                 | 66.7%    | 0.14            | 122          | 52.4%    |
| Somewhat likely                                                                                                                     | 73                           | 34.0%    | 2                                  | 11.1%    |                 | 75           | 32.2%    |
| Extremely likely                                                                                                                    | 30                           | 14.0%    | 3                                  | 16.7%    |                 | 33           | 14.2%    |
| How likely are you to maintain at least 6 feet distance from people who do not live in your home while at work?                     |                              |          |                                    |          |                 |              |          |
| Not at all likely                                                                                                                   | 114                          | 53.0%    | 10                                 | 55.6%    | 0.29            | 124          | 53.2%    |
| Somewhat likely                                                                                                                     | 80                           | 37.2%    | 4                                  | 22.2%    |                 | 84           | 36.1%    |
| Extremely likely                                                                                                                    | 20                           | 9.3%     | 3                                  | 16.7%    |                 | 23           | 9.9%     |
| <i>Booster Status</i>                                                                                                               | <i>Booster taken (n=167)</i> | <i>%</i> | <i>No Booster (n=48)</i>           | <i>%</i> | <i>Fisher's</i> | <i>Total</i> | <i>%</i> |

|                                                                                                                                     |                                   |          |                     |          |                 |              |          |
|-------------------------------------------------------------------------------------------------------------------------------------|-----------------------------------|----------|---------------------|----------|-----------------|--------------|----------|
| How likely are you to maintain at least 6 feet distance from people who do not live in your home while in public spaces?            |                                   |          |                     |          |                 |              |          |
| Not at all likely                                                                                                                   | 58                                | 34.7%    | 30                  | 62.5%    | 0.003**         | 88           | 40.9%    |
| Somewhat likely                                                                                                                     | 75                                | 44.9%    | 11                  | 22.9%    |                 | 86           | 40.0%    |
| Extremely likely                                                                                                                    | 33                                | 19.8%    | 7                   | 14.6%    |                 | 40           | 18.6%    |
| How likely are you to maintain at least 6 feet distance from people who do not live in your home while at small private gatherings? |                                   |          |                     |          |                 |              |          |
| Not at all likely                                                                                                                   | 77                                | 46.1%    | 33                  | 68.8%    | 0.02*           | 110          | 51.2%    |
| Somewhat likely                                                                                                                     | 64                                | 38.3%    | 9                   | 18.8%    |                 | 73           | 34.0%    |
| Extremely likely                                                                                                                    | 24                                | 14.4%    | 6                   | 12.5%    |                 | 30           | 14.0%    |
| How likely are you to maintain at least 6 feet distance from people who do not live in your home while at work?                     |                                   |          |                     |          |                 |              |          |
| Not at all likely                                                                                                                   | 81                                | 48.5%    | 33                  | 68.8%    | 0.02*           |              | 53.0%    |
| Somewhat likely                                                                                                                     | 70                                | 41.9%    | 10                  | 20.8%    |                 | 80           | 37.2%    |
| Extremely likely                                                                                                                    | 15                                | 9.0%     | 5                   | 10.4%    |                 | 20           | 9.3%     |
| <i>Gender</i>                                                                                                                       | <i>Female (n=147)</i>             | <i>%</i> | <i>Male (n=72)</i>  | <i>%</i> | <i>Fisher's</i> | <i>Total</i> | <i>%</i> |
| How likely are you to maintain at least 6 feet distance from people who do not live in your home while in public spaces?            |                                   |          |                     |          |                 |              |          |
| Not at all likely                                                                                                                   | 61                                | 41.5%    | 31                  | 43.1%    | 0.20            | 92           | 42.0%    |
| Somewhat likely                                                                                                                     | 53                                | 36.1%    | 32                  | 44.4%    |                 | 85           | 38.8%    |
| Extremely likely                                                                                                                    | 32                                | 21.8%    | 9                   | 12.5%    |                 | 41           | 18.7%    |
| How likely are you to maintain at least 6 feet distance from people who do not live in your home while at small private gatherings? |                                   |          |                     |          |                 |              |          |
| Not at all likely                                                                                                                   | 76                                | 51.7%    | 39                  | 54.2%    | 0.40            | 115          | 52.5%    |
| Somewhat likely                                                                                                                     | 48                                | 32.7%    | 26                  | 36.1%    |                 | 74           | 33.8%    |
| Extremely likely                                                                                                                    | 22                                | 15.0%    | 6                   | 8.3%     |                 | 28           | 12.8%    |
| How likely are you to maintain at least 6 feet distance from people who do not live in your home while at work?                     |                                   |          |                     |          |                 |              |          |
| Not at all likely                                                                                                                   | 82                                | 55.8%    | 35                  | 48.6%    | 0.28            | 117          | 53.4%    |
| Somewhat likely                                                                                                                     | 49                                | 33.3%    | 32                  | 44.4%    |                 | 81           | 37.0%    |
| Extremely likely                                                                                                                    | 15                                | 10.2%    | 5                   | 6.9%     |                 | 20           | 9.1%     |
| <i>Race</i>                                                                                                                         | <i>Non-Hispanic White (n=191)</i> | <i>%</i> | <i>Other (n=22)</i> | <i>%</i> | <i>Fisher's</i> | <i>Total</i> | <i>%</i> |
| How likely are you to maintain at least 6 feet distance from people who do not live in your home while in public spaces?            |                                   |          |                     |          |                 |              |          |
| Not at all likely                                                                                                                   | 85                                | 44.5%    | 4                   | 18.2%    | 0.04*           | 89           | 41.8%    |

|                                                                                                                                     |     |       |    |       |       |     |       |
|-------------------------------------------------------------------------------------------------------------------------------------|-----|-------|----|-------|-------|-----|-------|
| Somewhat likely                                                                                                                     | 72  | 37.7% | 11 | 50.0% |       | 83  | 39.0% |
| Extremely likely                                                                                                                    | 33  | 17.3% | 7  | 31.8% |       | 40  | 18.8% |
| How likely are you to maintain at least 6 feet distance from people who do not live in your home while at small private gatherings? |     |       |    |       |       |     |       |
| Not at all likely                                                                                                                   | 107 | 56.0% | 6  | 27.3% | 0.03* | 113 | 53.1% |
| Somewhat likely                                                                                                                     | 60  | 31.4% | 12 | 54.5% |       | 72  | 33.8% |
| Extremely likely                                                                                                                    | 23  | 12.0% | 4  | 18.2% |       | 27  | 12.7% |
| How likely are you to maintain at least 6 feet distance from people who do not live in your home while at work?                     |     |       |    |       |       |     |       |
| Not at all likely                                                                                                                   | 106 | 55.5% | 8  | 36.4% | 0.10  | 114 | 53.5% |
| Somewhat likely                                                                                                                     | 69  | 36.1% | 10 | 45.5% |       | 79  | 37.1% |
| Extremely likely                                                                                                                    | 15  | 7.9%  | 4  | 18.2% |       | 19  | 8.9%  |

| <i>County</i>                                                                                                                       | <i>Cumberland and Ocean (n=24)</i> | <i>%</i> | <i>Other Counties (n=205)</i> | <i>%</i> | <i>Fisher's</i> | <i>Total</i> | <i>%</i> |
|-------------------------------------------------------------------------------------------------------------------------------------|------------------------------------|----------|-------------------------------|----------|-----------------|--------------|----------|
| How likely are you to maintain at least 6 feet distance from people who do not live in your home while in public spaces?            |                                    |          |                               |          |                 |              |          |
| Not at all likely                                                                                                                   | 11                                 | 45.8%    | 85                            | 41.5%    | 0.78            | 96           | 41.9%    |
| Somewhat likely                                                                                                                     | 10                                 | 41.7%    | 79                            | 38.5%    |                 | 89           | 38.9%    |
| Extremely likely                                                                                                                    | 3                                  | 12.5%    | 40                            | 19.5%    |                 | 43           | 18.8%    |
| How likely are you to maintain at least 6 feet distance from people who do not live in your home while at small private gatherings? |                                    |          |                               |          |                 |              |          |
| Not at all likely                                                                                                                   | 14                                 | 58.3%    | 106                           | 52.7%    | 0.79            | 120          | 52.4%    |
| Somewhat likely                                                                                                                     | 8                                  | 33.3%    | 67                            | 32.7%    |                 | 75           | 32.8%    |
| Extremely likely                                                                                                                    | 2                                  | 8.3%     | 30                            | 14.6%    |                 | 32           | 14.0%    |
| How likely are you to maintain at least 6 feet distance from people who do not live in your home while at work?                     |                                    |          |                               |          |                 |              |          |
| Not at all likely                                                                                                                   | 9                                  | 37.5%    | 112                           | 54.6%    | 0.08            | 121          | 52.8%    |
| Somewhat likely                                                                                                                     | 14                                 | 58.3%    | 70                            | 34.1%    |                 | 84           | 36.7%    |
| Extremely likely                                                                                                                    | 1                                  | 4.2%     | 22                            | 10.7%    |                 | 23           | 10.0%    |

<sup>a</sup>No positive diagnosis consists of both a negative diagnosis and "I do not know". I do not know means either an inconclusive test or the participant did not take a test.

Note: IPNA is "I prefer not to answer", \*p<0.05, \*\* p<0.01, \*\*\*p<0.001

**Supplemental Table 4:** COVID-19 safety practice information related to mask wearing by stratification among the NJ secondary or high school teachers.

| <i>COVID Diagnosis Status</i>                                                 | <i>Positive diagnosis (n=106)</i> | <i>%</i> | <i>No Positive diagnosis (n=124)</i> | <i>%</i> | <i>Fisher's</i> | <i>Total</i> | <i>%</i> |
|-------------------------------------------------------------------------------|-----------------------------------|----------|--------------------------------------|----------|-----------------|--------------|----------|
| How likely are you to wear masks while in work settings outside the home?     |                                   |          |                                      |          |                 |              |          |
| Not at all likely                                                             | 57                                | 53.8%    | 65                                   | 52.4%    | 0.95            | 122          | 53.0%    |
| Somewhat likely                                                               | 17                                | 16.0%    | 21                                   | 16.9%    |                 | 38           | 16.5%    |
| Extremely likely                                                              | 31                                | 29.2%    | 38                                   | 30.6%    |                 | 69           | 30.0%    |
| How likely are you to wear masks while using public transportation?           |                                   |          |                                      |          |                 |              |          |
| Not at all likely                                                             | 47                                | 44.3%    | 32                                   | 25.8%    | 0.01**          | 79           | 34.3%    |
| Somewhat likely                                                               | 22                                | 20.8%    | 32                                   | 25.8%    |                 | 54           | 23.5%    |
| Extremely likely                                                              | 36                                | 34.0%    | 60                                   | 48.4%    |                 | 96           | 41.7%    |
| How likely are you to wear masks while going for a walk in your neighborhood? |                                   |          |                                      |          |                 |              |          |
| Not at all likely                                                             | 85                                | 80.2%    | 107                                  | 86.3%    | 0.25            | 192          | 83.5%    |
| Somewhat likely                                                               | 7                                 | 6.6%     | 3                                    | 2.4%     |                 | 10           | 4.3%     |
| Extremely likely                                                              | 14                                | 13.2%    | 12                                   | 9.7%     |                 | 26           | 11.3%    |
| How likely are you to wear masks while shopping inside a store?               |                                   |          |                                      |          |                 |              |          |
| Not at all likely                                                             | 51                                | 48.1%    | 51                                   | 41.1%    | 0.45            | 102          | 44.3%    |
| Somewhat likely                                                               | 26                                | 24.5%    | 39                                   | 31.5%    |                 | 65           | 28.3%    |
| Extremely likely                                                              | 29                                | 27.4%    | 34                                   | 27.4%    |                 | 63           | 27.4%    |
| How likely are you to wear masks while inside a friend's house?               |                                   |          |                                      |          |                 |              |          |
| Not at all likely                                                             | 77                                | 72.6%    | 92                                   | 74.2%    | 0.95            | 169          | 73.5%    |
| Somewhat likely                                                               | 16                                | 15.1%    | 17                                   | 13.7%    |                 | 33           | 14.3%    |
| Extremely likely                                                              | 12                                | 11.3%    | 15                                   | 12.1%    |                 | 27           | 11.7%    |
| How likely are you to wear masks while in other outdoor spaces?               |                                   |          |                                      |          |                 |              |          |
| Not at all likely                                                             | 81                                | 76.4%    | 103                                  | 83.1%    | 0.54            | 184          | 80.0%    |
| Somewhat likely                                                               | 9                                 | 8.5%     | 8                                    | 6.5%     |                 | 17           | 7.4%     |
| Extremely likely                                                              | 15                                | 14.2%    | 13                                   | 10.5%    |                 | 28           | 12.2%    |
|                                                                               |                                   |          |                                      |          |                 |              |          |
| <i>COVID-19 Vaccination Status</i>                                            | <i>Vaccinated (n=215)</i>         | <i>%</i> | <i>Unvaccinated or IPNA(n=18)</i>    | <i>%</i> | <i>Fisher's</i> | <i>Total</i> | <i>%</i> |

| How likely are you to wear masks while in work settings outside the home?     |                              |          |                          |          |                 |              |          |
|-------------------------------------------------------------------------------|------------------------------|----------|--------------------------|----------|-----------------|--------------|----------|
| Not at all likely                                                             | 110                          | 51.2%    | 13                       | 72.2%    | 0.29            | 123          | 52.8%    |
| Somewhat likely                                                               | 36                           | 16.7%    | 2                        | 11.1%    |                 | 38           | 16.3%    |
| Extremely likely                                                              | 67                           | 31.2%    | 3                        | 16.7%    |                 | 70           | 30.0%    |
| How likely are you to wear masks while using public transportation?           |                              |          |                          |          |                 |              |          |
| Not at all likely                                                             | 71                           | 33.0%    | 9                        | 50.0%    | 0.17            | 80           | 34.3%    |
| Somewhat likely                                                               | 49                           | 22.8%    | 5                        | 27.8%    |                 | 54           | 23.2%    |
| Extremely likely                                                              | 93                           | 43.3%    | 4                        | 22.2%    |                 | 97           | 41.6%    |
| How likely are you to wear masks while going for a walk in your neighborhood? |                              |          |                          |          |                 |              |          |
| Not at all likely                                                             | 178                          | 82.8%    | 16                       | 88.9%    | 1.00            | 194          | 83.3%    |
| Somewhat likely                                                               | 10                           | 4.7%     | 0                        | 0.0%     |                 | 10           | 4.3%     |
| Extremely likely                                                              | 25                           | 11.6%    | 2                        | 11.1%    |                 | 27           | 11.6%    |
| How likely are you to wear masks while shopping inside a store?               |                              |          |                          |          |                 |              |          |
| Not at all likely                                                             | 90                           | 41.9%    | 13                       | 72.2%    | 0.06            | 103          | 44.2%    |
| Somewhat likely                                                               | 63                           | 69.3%    | 3                        | 16.7%    |                 | 66           | 28.3%    |
| Extremely likely                                                              | 61                           | 28.3%    | 2                        | 11.1%    |                 | 63           | 27.0%    |
| How likely are you to wear masks while inside a friend’s house?               |                              |          |                          |          |                 |              |          |
| Not at all likely                                                             | 157                          | 73.0%    | 14                       | 77.8%    | 1.00            | 171          | 73.4%    |
| Somewhat likely                                                               | 31                           | 14.4%    | 2                        | 11.1%    |                 | 33           | 14.2%    |
| Extremely likely                                                              | 25                           | 11.6%    | 2                        | 11.1%    |                 | 27           | 11.6%    |
| How likely are you to wear masks while in other outdoor spaces?               |                              |          |                          |          |                 |              |          |
| Not at all likely                                                             | 171                          | 79.5%    | 15                       | 83.3%    | 1.00            | 186          | 79.8%    |
| Somewhat likely                                                               | 16                           | 7.4%     | 1                        | 5.6%     |                 | 17           | 7.3%     |
| Extremely likely                                                              | 26                           | 12.1%    | 2                        | 11.1%    |                 | 28           | 12.0%    |
| <i>Booster Status</i>                                                         | <i>Booster taken (n=167)</i> | <i>%</i> | <i>No Booster (n=48)</i> | <i>%</i> | <i>Fisher’s</i> | <i>Total</i> | <i>%</i> |
| How likely are you to wear masks while in work settings outside the home?     |                              |          |                          |          |                 |              |          |
| Not at all likely                                                             | 75                           | 44.9%    | 35                       | 72.9%    | 0.003*          | 110          | 51.2%    |
| Somewhat likely                                                               | 30                           | 18.0%    | 6                        | 12.5%    |                 | 36           | 16.7%    |

|                                                                               |     |       |    |       |           |     |       |
|-------------------------------------------------------------------------------|-----|-------|----|-------|-----------|-----|-------|
| Extremely likely                                                              | 60  | 35.9% | 7  | 14.6% |           | 67  | 31.2% |
| How likely are you to wear masks while using public transportation?           |     |       |    |       |           |     |       |
| Not at all likely                                                             | 45  | 26.9% | 26 | 54.2% | <0.001*** | 71  | 33.0% |
| Somewhat likely                                                               | 38  | 22.8% | 11 | 22.9% |           | 49  | 22.8% |
| Extremely likely                                                              | 83  | 49.7% | 10 | 20.8% |           | 93  | 43.3% |
| How likely are you to wear masks while going for a walk in your neighborhood? |     |       |    |       |           |     |       |
| Not at all likely                                                             | 138 | 82.6% | 40 | 83.3% | 0.94      | 178 | 82.8% |
| Somewhat likely                                                               | 8   | 4.8%  | 2  | 4.2%  |           | 10  | 4.7%  |
| Extremely likely                                                              | 19  | 11.4% | 6  | 12.5% |           | 25  | 11.6% |
| How likely are you to wear masks while shopping inside a store?               |     |       |    |       |           |     |       |
| Not at all likely                                                             | 64  | 38.3% | 26 | 54.2% | 0.12      | 90  | 41.9% |
| Somewhat likely                                                               | 50  | 29.9% | 13 | 27.1% |           | 63  | 29.3% |
| Extremely likely                                                              | 52  | 31.1% | 9  | 18.8% |           | 61  | 28.4% |
| How likely are you to wear masks while inside a friend’s house?               |     |       |    |       |           |     |       |
| Not at all likely                                                             | 118 | 70.7% | 39 | 81.3% | 0.19      | 157 | 73.0% |
| Somewhat likely                                                               | 28  | 16.8% | 3  | 6.3%  |           | 31  | 14.4% |
| Extremely likely                                                              | 19  | 11.4% | 6  | 12.5% |           | 25  | 11.6% |
| How likely are you to wear masks while in other outdoor spaces?               |     |       |    |       |           |     |       |
| Not at all likely                                                             | 130 | 77.8% | 41 | 85.4% | 0.05*     | 171 | 79.5% |
| Somewhat likely                                                               | 16  | 9.6%  | 0  | 0.0%  |           | 16  | 7.4%  |
| Extremely likely                                                              | 19  | 11.4% | 7  | 14.6% |           | 26  | 12.1% |

| <i>Gender</i>                                                             | <i>Female (n=147)</i> | <i>%</i> | <i>Male (n=72)</i> | <i>%</i> | <i>Fisher's</i> | <i>Total</i> | <i>%</i> |
|---------------------------------------------------------------------------|-----------------------|----------|--------------------|----------|-----------------|--------------|----------|
| How likely are you to wear masks while in work settings outside the home? |                       |          |                    |          |                 |              |          |
| Not at all likely                                                         | 73                    | 49.7%    | 42                 | 58.3%    | 0.001***        | 115          | 52.5%    |
| Somewhat likely                                                           | 17                    | 11.6%    | 18                 | 25.0%    |                 | 35           | 16.0%    |

|                                                                               |     |       |    |       |       |     |       |
|-------------------------------------------------------------------------------|-----|-------|----|-------|-------|-----|-------|
| Extremely likely                                                              | 55  | 37.4% | 12 | 16.7% |       | 67  | 30.6% |
| How likely are you to wear masks while using public transportation?           |     |       |    |       |       |     |       |
| Not at all likely                                                             | 45  | 30.6% | 29 | 40.3% | 0.02* | 74  | 33.8% |
| Somewhat likely                                                               | 30  | 20.4% | 22 | 30.6% |       | 52  | 23.7% |
| Extremely likely                                                              | 71  | 48.3% | 21 | 29.2% |       | 92  | 42.0% |
| How likely are you to wear masks while going for a walk in your neighborhood? |     |       |    |       |       |     |       |
| Not at all likely                                                             | 123 | 83.7% | 59 | 81.9% | 0.75  | 182 | 83.1% |
| Somewhat likely                                                               | 7   | 4.8%  | 3  | 4.2%  |       | 10  | 4.6%  |
| Extremely likely                                                              | 15  | 10.2% | 10 | 13.9% |       | 25  | 11.4% |
| How likely are you to wear masks while shopping inside a store?               |     |       |    |       |       |     |       |
| Not at all likely                                                             | 62  | 42.2% | 33 | 45.8% | 0.28  | 95  | 43.4% |
| Somewhat likely                                                               | 39  | 26.5% | 24 | 33.3% |       | 63  | 28.8% |
| Extremely likely                                                              | 45  | 30.6% | 15 | 20.8% |       | 60  | 27.4% |
| How likely are you to wear masks while inside a friend’s house?               |     |       |    |       |       |     |       |
| Not at all likely                                                             | 110 | 74.8% | 50 | 69.4% | 0.25  | 160 | 73.1% |
| Somewhat likely                                                               | 22  | 15.0% | 10 | 13.9% |       | 32  | 14.6% |
| Extremely likely                                                              | 13  | 8.8%  | 12 | 16.7% |       | 25  | 11.4% |
| How likely are you to wear masks while in other outdoor spaces?               |     |       |    |       |       |     |       |
| Not at all likely                                                             | 118 | 80.3% | 57 | 79.2% | 0.33  | 175 | 79.9% |
| Somewhat likely                                                               | 13  | 8.8%  | 3  | 4.2%  |       | 16  | 7.3%  |
| Extremely likely                                                              | 15  | 10.2% | 11 | 15.3% |       | 26  | 11.9% |

| Race <sup>a</sup>                                                         | Non-Hispanic White (n=191) | %     | Other (n=22) | %     | Fisher's | Total | %     |
|---------------------------------------------------------------------------|----------------------------|-------|--------------|-------|----------|-------|-------|
| How likely are you to wear masks while in work settings outside the home? |                            |       |              |       |          |       |       |
| Not at all likely                                                         | 103                        | 53.9% | 8            | 36.4% | 0.15     | 111   | 52.1% |
| Somewhat likely                                                           | 31                         | 16.2% | 3            | 13.6% |          | 34    | 16.0% |
| Extremely likely                                                          | 56                         | 29.3% | 11           | 50.0% |          | 67    | 31.5% |

| How likely are you to wear masks while using public transportation?           |     |       |    |       |        |     |       |
|-------------------------------------------------------------------------------|-----|-------|----|-------|--------|-----|-------|
| Not at all likely                                                             | 65  | 34.0% | 5  | 22.7% | 0.34   | 70  | 32.9% |
| Somewhat likely                                                               | 46  | 24.1% | 4  | 18.2% |        | 50  | 23.5% |
| Extremely likely                                                              | 79  | 41.4% | 13 | 59.1% |        | 92  | 43.2% |
| How likely are you to wear masks while going for a walk in your neighborhood? |     |       |    |       |        |     |       |
| Not at all likely                                                             | 164 | 85.9% | 14 | 63.6% | 0.01** | 178 | 83.6% |
| Somewhat likely                                                               | 6   | 3.1%  | 3  | 13.6% |        | 9   | 4.2%  |
| Extremely likely                                                              | 19  | 9.9%  | 5  | 22.7% |        | 24  | 11.3% |
| How likely are you to wear masks while shopping inside a store?               |     |       |    |       |        |     |       |
| Not at all likely                                                             | 85  | 44.5% | 6  | 27.3% | 0.02*  | 91  | 42.7% |
| Somewhat likely                                                               | 57  | 29.8% | 4  | 18.2% |        | 61  | 28.6% |
| Extremely likely                                                              | 48  | 25.1% | 12 | 54.5% |        | 60  | 28.2% |
| How likely are you to wear masks while inside a friend's house?               |     |       |    |       |        |     |       |
| Not at all likely                                                             | 145 | 75.9% | 12 | 54.5% | 0.03*  | 157 | 73.7% |
| Somewhat likely                                                               | 26  | 13.6% | 4  | 18.2% |        | 30  | 14.1% |
| Extremely likely                                                              | 19  | 9.9%  | 6  | 27.3% |        | 25  | 11.7% |
| How likely are you to wear masks while in other outdoor spaces?               |     |       |    |       |        |     |       |
| Not at all likely                                                             | 157 | 82.2% | 14 | 63.6% | 0.14   | 171 | 80.3% |
| Somewhat likely                                                               | 12  | 6.3%  | 2  | 9.1%  |        | 14  | 6.6%  |
| Extremely likely                                                              | 21  | 11.0% | 5  | 22.7% |        | 26  | 12.2% |

|                                                                               |    |       |     |       |      |     |       |
|-------------------------------------------------------------------------------|----|-------|-----|-------|------|-----|-------|
| Not at all likely                                                             | 8  | 33.3% | 70  | 34.1% | 0.76 | 78  | 34.1% |
| Somewhat likely                                                               | 7  | 29.2% | 46  | 22.4% |      | 53  | 23.1% |
| Extremely likely                                                              | 9  | 37.5% | 87  | 42.4% |      | 96  | 41.9% |
| How likely are you to wear masks while going for a walk in your neighborhood? |    |       |     |       |      |     |       |
| Not at all likely                                                             | 20 | 83.3% | 170 | 82.9% | 0.46 | 190 | 83.0% |
| Somewhat likely                                                               | 2  | 8.3%  | 8   | 3.9%  |      | 10  | 4.4%  |
| Extremely likely                                                              | 2  | 8.3%  | 25  | 12.2% |      | 27  | 11.8% |
| How likely are you to wear masks while shopping inside a store?               |    |       |     |       |      |     |       |
| Not at all likely                                                             | 12 | 50.0% | 88  | 42.9% | 0.76 | 100 | 43.7% |
| Somewhat likely                                                               | 7  | 29.2% | 58  | 28.3% |      | 65  | 28.4% |
| Extremely likely                                                              | 5  | 20.8% | 58  | 28.3% |      | 63  | 27.5% |
| How likely are you to wear masks while inside a friend's house?               |    |       |     |       |      |     |       |
| Not at all likely                                                             | 17 | 70.8% | 150 | 73.2% | 0.64 | 167 | 72.9% |
| Somewhat likely                                                               | 5  | 20.8% | 28  | 13.7% |      | 33  | 14.4% |
| Extremely likely                                                              | 2  | 8.3%  | 25  | 12.2% |      | 27  | 11.8% |
| How likely are you to wear masks while in other outdoor spaces?               |    |       |     |       |      |     |       |
| Not at all likely                                                             | 19 | 79.2% | 163 | 79.5% | 0.92 | 182 | 79.5% |
| Somewhat likely                                                               | 2  | 8.3%  | 15  | 7.3%  |      | 17  | 7.4%  |
| Extremely likely                                                              | 3  | 12.5% | 25  | 12.2% |      | 28  | 12.2% |

Note: IPNA is "I prefer not to answer", \*p<0.05, \*\* p<0.01, \*\*\*p<0.001

‡ "Other" consisted of: American Indian or Alaskan Native, Middle Eastern or North African, Hispanic Asian, Hispanic Black, Hispanic White, Non-Hispanic Asian, Non-Hispanic Black, those who indicated they were multiracial and those who self-identified as Other.

**Supplemental Table 5:** Concern of contracting/infection of COVID-19 by stratification among the NJ secondary or high school teachers.

| <i>COVID Diagnosis Status<sup>b</sup></i>              | <i>Positive diagnosis (n=106)</i> | <i>%</i> | <i>No Positive diagnosis (n=124)</i> | <i>%</i> | <i>Fisher's</i> | <i>Total</i> | <i>%</i> |
|--------------------------------------------------------|-----------------------------------|----------|--------------------------------------|----------|-----------------|--------------|----------|
| How concerned are you of contracting COVID-19 at work? |                                   |          |                                      |          |                 |              |          |
| Not at all concerned                                   | 35                                | 33.0%    | 24                                   | 19.4%    | 0.10            | 59           | 25.7%    |

|                                                                                                                                                                               |    |       |    |       |           |    |       |
|-------------------------------------------------------------------------------------------------------------------------------------------------------------------------------|----|-------|----|-------|-----------|----|-------|
| A little concerned                                                                                                                                                            | 33 | 31.1% | 49 | 39.5% |           | 82 | 35.7% |
| Somewhat concerned                                                                                                                                                            | 24 | 22.6% | 28 | 22.6% |           | 52 | 22.6% |
| Very concerned                                                                                                                                                                | 14 | 13.2% | 23 | 18.5% |           | 37 | 16.1% |
| How concerned are you of contracting COVID-19 outside of work? (For example: at the grocery store, when you are using transportation, or in other aspects of your daily life) |    |       |    |       |           |    |       |
| Not at all concerned                                                                                                                                                          | 50 | 47.2% | 32 | 25.8% | <0.001*** | 82 | 35.7% |
| A little concerned                                                                                                                                                            | 28 | 26.4% | 54 | 43.5% |           | 82 | 35.7% |
| Somewhat concerned                                                                                                                                                            | 23 | 21.7% | 24 | 19.4% |           | 47 | 20.4% |
| Very concerned                                                                                                                                                                | 5  | 4.7%  | 14 | 11.3% |           | 19 | 8.3%  |
| How concerned are you of infecting your family or friends with COVID-19?                                                                                                      |    |       |    |       |           |    |       |
| Not at all concerned                                                                                                                                                          | 24 | 22.6% | 26 | 21.0% | 0.93      | 50 | 21.7% |
| A little concerned                                                                                                                                                            | 28 | 26.4% | 32 | 25.8% |           | 60 | 26.1% |
| Somewhat concerned                                                                                                                                                            | 25 | 23.6% | 27 | 21.8% |           | 52 | 22.6% |
| Very concerned                                                                                                                                                                | 29 | 27.4% | 39 | 31.5% |           | 68 | 29.6% |

[illegible]

|                      |    |       |    |       |           |    |       |
|----------------------|----|-------|----|-------|-----------|----|-------|
| Not at all concerned | 40 | 18.6% | 12 | 66.7% | <0.001*** | 52 | 22.3% |
| A little concerned   | 59 | 27.4% | 2  | 11.1% |           | 61 | 26.2% |
| Somewhat concerned   | 50 | 23.3% | 2  | 11.1% |           | 52 | 22.3% |
| Very concerned       | 66 | 30.7% | 2  | 11.1% |           | 68 | 29.2% |

| <i>Booster Status</i>                                                                                                                                                         | <i>Booster taken (n=167)</i> | <i>%</i> | <i>No Booster (n=48)</i> | <i>%</i> | <i>Fisher's</i> | <i>Total</i> | <i>%</i> |
|-------------------------------------------------------------------------------------------------------------------------------------------------------------------------------|------------------------------|----------|--------------------------|----------|-----------------|--------------|----------|
| How concerned are you of contracting COVID-19 at work?                                                                                                                        |                              |          |                          |          |                 |              |          |
| Not at all concerned                                                                                                                                                          | 28                           | 16.8%    | 19                       | 39.6%    | 0.02*           | 47           | 21.9%    |
| A little concerned                                                                                                                                                            | 67                           | 40.1%    | 13                       | 27.1%    |                 | 80           | 37.2%    |
| Somewhat concerned                                                                                                                                                            | 43                           | 25.7%    | 10                       | 20.8%    |                 | 53           | 24.7%    |
| Very concerned                                                                                                                                                                | 29                           | 17.4%    | 6                        | 12.5%    |                 | 35           | 16.3%    |
| How concerned are you of contracting COVID-19 outside of work? (For example: at the grocery store, when you are using transportation, or in other aspects of your daily life) |                              |          |                          |          |                 |              |          |
| Not at all concerned                                                                                                                                                          | 47                           | 28.1%    | 25                       | 52.1%    | 0.01**          | 72           | 33.5%    |
| A little concerned                                                                                                                                                            | 63                           | 37.7%    | 16                       | 33.3%    |                 | 79           | 36.7%    |
| Somewhat concerned                                                                                                                                                            | 41                           | 24.6%    | 5                        | 10.4%    |                 | 46           | 21.4%    |
| Very concerned                                                                                                                                                                | 16                           | 9.6%     | 2                        | 4.2%     |                 | 18           | 8.4%     |
| How concerned are you of infecting your family or friends with COVID-19?                                                                                                      |                              |          |                          |          |                 |              |          |
| Not at all concerned                                                                                                                                                          | 28                           | 16.8%    | 12                       | 25.0%    | 0.60            | 40           | 18.6%    |
| A little concerned                                                                                                                                                            | 46                           | 27.5%    | 13                       | 27.1%    |                 | 59           | 27.4%    |
| Somewhat concerned                                                                                                                                                            | 41                           | 24.6%    | 9                        | 18.8%    |                 | 50           | 23.3%    |
| Very concerned                                                                                                                                                                | 52                           | 31.1%    | 14                       | 29.2%    |                 | 66           | 30.7%    |

| <i>Gender</i>                                          | <i>Female (n=147)</i> | <i>%</i> | <i>Male (n=72)</i> | <i>%</i> | <i>Fisher's</i> | <i>Total</i> | <i>%</i> |
|--------------------------------------------------------|-----------------------|----------|--------------------|----------|-----------------|--------------|----------|
| How concerned are you of contracting COVID-19 at work? |                       |          |                    |          |                 |              |          |
| Not at all concerned                                   | 32                    | 21.8%    | 23                 | 31.9%    | 0.10            | 55           | 25.1%    |
| A little concerned                                     | 48                    | 32.7%    | 28                 | 38.9%    |                 | 76           | 34.7%    |
| Somewhat concerned                                     | 38                    | 25.9%    | 14                 | 19.4%    |                 | 52           | 23.7%    |

|                                                                                                                                                                               |    |       |    |       |      |    |       |
|-------------------------------------------------------------------------------------------------------------------------------------------------------------------------------|----|-------|----|-------|------|----|-------|
| Very Concerned                                                                                                                                                                | 29 | 19.7% | 7  | 9.7%  |      | 36 | 16.4% |
| How concerned are you of contracting COVID-19 outside of work? (For example: at the grocery store, when you are using transportation, or in other aspects of your daily life) |    |       |    |       |      |    |       |
| Not at all concerned                                                                                                                                                          | 47 | 32.0% | 32 | 44.4% | 0.08 | 79 | 36.1% |
| A little concerned                                                                                                                                                            | 50 | 34.0% | 26 | 36.1% |      | 76 | 34.7% |
| Somewhat concerned                                                                                                                                                            | 35 | 23.8% | 12 | 16.7% |      | 47 | 21.5% |
| Very Concerned                                                                                                                                                                | 15 | 10.2% | 2  | 2.8%  |      | 17 | 7.8%  |
| How concerned are you of infecting your family or friends with COVID-19?                                                                                                      |    |       |    |       |      |    |       |
| Not at all concerned                                                                                                                                                          | 26 | 17.7% | 21 | 29.2% | 0.09 | 47 | 21.5% |
| A little concerned                                                                                                                                                            | 38 | 25.9% | 22 | 30.6% |      | 60 | 27.4% |
| Somewhat concerned                                                                                                                                                            | 32 | 21.8% | 14 | 19.4% |      | 46 | 21.0% |
| Very Concerned                                                                                                                                                                | 51 | 34.7% | 15 | 20.8% |      | 66 | 30.1% |

| <i>Race<sup>b</sup></i>                                                                                                                                                       | <i>Non-Hispanic White (n=191)</i> | <i>%</i> | <i>Other (n=22)</i> | <i>%</i> | <i>Fisher's</i> | <i>Total</i> | <i>%</i> |
|-------------------------------------------------------------------------------------------------------------------------------------------------------------------------------|-----------------------------------|----------|---------------------|----------|-----------------|--------------|----------|
| How concerned are you of contracting COVID-19 at work?                                                                                                                        |                                   |          |                     |          |                 |              |          |
| Not at all concerned                                                                                                                                                          | 50                                | 26.2%    | 3                   | 13.6%    | 0.002**         | 53           | 24.9%    |
| A little concerned                                                                                                                                                            | 67                                | 35.1%    | 9                   | 40.9%    |                 | 76           | 35.7%    |
| Somewhat concerned                                                                                                                                                            | 50                                | 26.2%    | 1                   | 4.5%     |                 | 51           | 23.9%    |
| Very Concerned                                                                                                                                                                | 24                                | 12.6%    | 9                   | 40.9%    |                 | 33           | 15.5%    |
| How concerned are you of contracting COVID-19 outside of work? (For example: at the grocery store, when you are using transportation, or in other aspects of your daily life) |                                   |          |                     |          |                 |              |          |
| Not at all concerned                                                                                                                                                          | 72                                | 37.7%    | 4                   | 18.2%    | 0.08            | 76           | 35.7%    |
| A little concerned                                                                                                                                                            | 67                                | 35.1%    | 9                   | 40.9%    |                 | 76           | 35.7%    |
| Somewhat concerned                                                                                                                                                            | 41                                | 21.5%    | 5                   | 22.7%    |                 | 46           | 21.6%    |
| Very Concerned                                                                                                                                                                | 11                                | 5.8%     | 4                   | 18.2%    |                 | 15           | 7.0%     |
| How concerned are you of infecting your family or friends with COVID-19?                                                                                                      |                                   |          |                     |          |                 |              |          |
| Not at all concerned                                                                                                                                                          | 42                                | 22.0%    | 3                   | 13.6%    | 0.67            | 45           | 21.1%    |
| A little concerned                                                                                                                                                            | 54                                | 28.3%    | 6                   | 27.3%    |                 | 60           | 28.2%    |

|                    |    |       |   |       |  |    |       |
|--------------------|----|-------|---|-------|--|----|-------|
| Somewhat concerned | 41 | 21.5% | 4 | 18.2% |  | 45 | 21.1% |
| Very Concerned     | 54 | 28.3% | 9 | 40.9% |  | 63 | 29.6% |

| County                                                                                                                                              | Cumberland and Ocean (n=24) | %     | Other Counties (n=205) | %     | Fisher's | Total | %     |
|-----------------------------------------------------------------------------------------------------------------------------------------------------|-----------------------------|-------|------------------------|-------|----------|-------|-------|
| How concerned are you of...                                                                                                                         |                             |       |                        |       |          |       |       |
| Contracting COVID-19 at work?                                                                                                                       |                             |       |                        |       |          |       |       |
| Not at all concerned                                                                                                                                | 6                           | 25.0% | 51                     | 24.9% | 0.16     | 57    | 24.9% |
| A little concerned                                                                                                                                  | 13                          | 54.2% | 69                     | 33.7% |          | 82    | 35.8% |
| Somewhat concerned                                                                                                                                  | 4                           | 16.7% | 49                     | 23.9% |          | 53    | 23.1% |
| Very Concerned                                                                                                                                      | 1                           | 4.2%  | 36                     | 17.6% |          | 37    | 16.2% |
| Contacting COVID-19 outside of work? (For example: at the grocery store, when you are using transportation, or in other aspects of your daily life) |                             |       |                        |       |          |       |       |
| Not at all concerned                                                                                                                                | 9                           | 37.5% | 74                     | 36.1% | 0.51     | 83    | 36.2% |
| A little concerned                                                                                                                                  | 9                           | 37.5% | 71                     | 34.6% |          | 80    | 34.9% |
| Somewhat concerned                                                                                                                                  | 6                           | 25.0% | 41                     | 20.0% |          | 47    | 20.5% |
| Very Concerned                                                                                                                                      | 0                           | 0.0%  | 19                     | 9.3%  |          | 19    | 8.3%  |
| Infecting your family or friends with COVID-19?                                                                                                     |                             |       |                        |       |          |       |       |
| Not at all concerned                                                                                                                                | 6                           | 25.0% | 43                     | 21.0% | 0.20     | 49    | 21.4% |
| A little concerned                                                                                                                                  | 9                           | 37.5% | 52                     | 25.4% |          | 61    | 26.6% |
| Somewhat concerned                                                                                                                                  | 6                           | 25.0% | 45                     | 22.0% |          | 51    | 22.3% |
| Very concerned                                                                                                                                      | 3                           | 12.5% | 65                     | 31.7% |          | 68    | 29.7% |

Note: IPNA is "I prefer not to answer", \*p<0.05, \*\* p<0.01, \*\*\*p<0.001

<sup>a</sup>No positive diagnosis consists of both a negative diagnosis and "I do not know". I do not know means either an inconclusive test or the participant did not take a test.

<sup>b</sup>"Other" consisted of: American Indian or Alaskan Native, Middle Eastern or North African, Hispanic Asian, Hispanic Black, Hispanic White, Non-Hispanic Asian, Non-Hispanic Black, those who indicated they were multiracial and those who self-identified as Other.

**Supplemental Table 6:** Likelihood of Wearing a Mask and Social Distancing at the Workplace (n=230 answered both)

|                                                                              | <i>How likely are you to maintain at least 6 feet distance from people at work?</i> |                   |       |                 |       |                  |      |           |
|------------------------------------------------------------------------------|-------------------------------------------------------------------------------------|-------------------|-------|-----------------|-------|------------------|------|-----------|
| <i>How likely are you to wear a mask in a work setting outside the home?</i> |                                                                                     | Not at all likely | %     | Somewhat likely | %     | Extremely likely | %    | P-Value   |
|                                                                              | Not at all likely                                                                   | 87                | 37.8% | 30              | 13.0% | 6                | 2.6% | <0.001*** |
|                                                                              | Somewhat likely                                                                     | 11                | 4.8%  | 20              | 8.7%  | 6                | 2.6% |           |
|                                                                              | Extremely likely                                                                    | 26                | 11.3% | 33              | 14.4% | 11               | 4.8% |           |

Note: Percentage is percentage of total table count. \*p<0.05, \*\* p<0.01, \*\*\*p<0.001

Most participants who reported it was not at all likely they would wear a mask while in a work setting outside the home also reported it was not at all likely they would maintain at least a 6 feet distance from people at work (87, 37.8%).

About 5% of participants who reported it was extremely likely they would wear a mask in a work setting outside the home also reported it was extremely likely they would maintain at least a 6 feet distance from people at work (n=11).

About 14% of participants who reported it was extremely likely they would wear a mask in a work setting outside the home also reported it was somewhat likely they would maintain at least a 6 feet distance from people at work (n=33)

**Supplemental Table 7:** Likelihood of Wearing a Mask and Social Distancing in Indoor Places with Friends/Family (n=229 answered both)

|                                                                   | <i>How likely are you to maintain at least 6 feet distance from people at small gatherings?</i> |                   |       |                 |       |                  |      |         |
|-------------------------------------------------------------------|-------------------------------------------------------------------------------------------------|-------------------|-------|-----------------|-------|------------------|------|---------|
| <i>How likely are you to wear a mask inside a friend's house?</i> |                                                                                                 | Not at all likely | %     | Somewhat likely | %     | Extremely likely | %    | P-Value |
|                                                                   | Not at all likely                                                                               | 100               | 43.7% | 50              | 21.8% | 19               | 8.3% | 0.003** |
|                                                                   | Somewhat likely                                                                                 | 8                 | 3.5%  | 15              | 6.6%  | 10               | 4.4% |         |
|                                                                   | Extremely likely                                                                                | 14                | 6.1%  | 9               | 3.9%  | 4                | 1.8% |         |

Note: Percentage is percentage of total table count. \*p<0.05, \*\* p<0.01, \*\*\*p<0.001

**Supplemental Table 8:** Likelihood of Wearing a Mask and Social Distancing in Public Transport (n=231 answered both)

|                                                                          | <i>How likely are you to maintain at least 6 feet distance from people who do not live in your home?</i> |                   |       |                 |       |                  |       |           |
|--------------------------------------------------------------------------|----------------------------------------------------------------------------------------------------------|-------------------|-------|-----------------|-------|------------------|-------|-----------|
| <i>How likely are you to wear a mask while on public transportation?</i> |                                                                                                          | Not at all likely | %     | Somewhat likely | %     | Extremely likely | %     | P-Value   |
|                                                                          | Not at all likely                                                                                        | 49                | 21.2% | 25              | 10.8% | 6                | 2.6%  | <0.001*** |
|                                                                          | Somewhat likely                                                                                          | 26                | 11.3% | 21              | 9.1%  | 7                | 3.0%  |           |
|                                                                          | Extremely likely                                                                                         | 23                | 10.0% | 43              | 18.6% | 31               | 13.4% |           |

Note: Percentage is percentage of total table count. \*p<0.05, \*\* p<0.01, \*\*\*p<0.001

Most participants who reported it was not at all likely they would wear a mask while on public transportation also reported it was not at all likely they would maintain at least a 6 feet distance from people who do not live in your home (49, 21.2%).

About 44% of participants reported it would be at least somewhat likely they would both wear a mask while on public transportation and maintain at least a 6 feet distance from people who do not live in your home (n=102).

**Supplemental Table 9:** Likelihood of Wearing a Mask and Social Distancing in Stores (n=232 answered both)

|                                                            | <i>How likely are you to maintain at least 6 feet distance from people who do not live in your home?</i> |                   |       |                 |       |                  |      |           |
|------------------------------------------------------------|----------------------------------------------------------------------------------------------------------|-------------------|-------|-----------------|-------|------------------|------|-----------|
| <i>How likely are you to wear a mask while at a store?</i> |                                                                                                          | Not at all likely | %     | Somewhat likely | %     | Extremely likely | %    | P-Value   |
|                                                            | Not at all likely                                                                                        | 69                | 29.7% | 26              | 11.2% | 8                | 3.5% | <0.001*** |
|                                                            | Somewhat likely                                                                                          | 15                | 6.5%  | 38              | 16.4% | 13               | 5.6% |           |
|                                                            | Extremely likely                                                                                         | 14                | 6.0%  | 26              | 11.2% | 23               | 9.9% |           |

Note: Percentage is percentage of total table count. \*p<0.05, \*\* p<0.01, \*\*\*p<0.001

Most participants who reported it was not at all likely they would wear a mask while at a store also reported it was not at all likely they would maintain at least a 6 feet distance from people who do not live in your home (69, 29.7%).

About 43% of participants reported it would be at least somewhat likely they would both wear a mask while at a store and maintain at least a 6 feet distance from people who do not live in your home (n=100).

**Supplemental Table 10:** Level of Concern about COVID-19 and Mask Use at Workplaces (n=231 answered both)

|                                                                  |                      | <i>How likely are you to wear a mask in a work setting outside the home?</i> |       |                 |      |                  |       | P-Value   |
|------------------------------------------------------------------|----------------------|------------------------------------------------------------------------------|-------|-----------------|------|------------------|-------|-----------|
| <i>How concerned are you about contracting COVID-19 at work?</i> |                      | Not at all likely                                                            | %     | Somewhat likely | %    | Extremely likely | %     |           |
|                                                                  | Not at all concerned | 51                                                                           | 22.1% | 3               | 1.3% | 5                | 2.2%  | <0.001*** |
|                                                                  | A little concerned   | 44                                                                           | 19.0% | 18              | 7.8% | 21               | 9.1%  |           |
|                                                                  | Somewhat concerned   | 19                                                                           | 8.2%  | 12              | 5.2% | 21               | 9.1%  |           |
|                                                                  | Very concerned       | 9                                                                            | 3.9%  | 5               | 2.2% | 23               | 10.0% |           |

Note: Percentage is percentage of total table count. \*p<0.05, \*\* p<0.01, \*\*\*p<0.001

Most participants who reported they were not at all concerned about contracting COVID-19 at work also reported it was not at all likely they would wear a mask in a work setting outside the home (51, 22.1%).

About 27% of participants reported they were at least somewhat concerned/would be somewhat likely they would both contract COVID-19 at work and wear a mask in a work setting outside the home.

**Supplemental Table 11:** Level of Concern about COVID-19 and Social Distancing at Workplaces (n=231 answered both)

|                                                                  |                      | <i>How likely are you to maintain at least 6 feet distance from people at work?</i> |       |                 |       |                  |      | P-Value   |
|------------------------------------------------------------------|----------------------|-------------------------------------------------------------------------------------|-------|-----------------|-------|------------------|------|-----------|
| <i>How concerned are you about contracting COVID-19 at work?</i> |                      | Not at all likely                                                                   | %     | Somewhat likely | %     | Extremely likely | %    |           |
|                                                                  | Not at all concerned | 43                                                                                  | 18.7% | 11              | 4.8%  | 4                | 1.7% | <0.001*** |
|                                                                  | A little concerned   | 45                                                                                  | 19.5% | 33              | 14.3% | 5                | 2.2% |           |
|                                                                  | Somewhat concerned   | 22                                                                                  | 9.5%  | 26              | 11.3% | 5                | 2.2% |           |
|                                                                  | Very concerned       | 14                                                                                  | 6.1%  | 14              | 6.1%  | 9                | 3.9% |           |

Percentage is percentage of total table count. \*p<0.05, \*\* p<0.01, \*\*\*p<0.001

Most participants who reported they were a little concerned about contracting COVID-19 at work also reported it was not at all likely they would maintain at least a 6 feet distance from people at work (45, 19.5%).

About 24% of participants reported they were at least somewhat concerned/somewhat likely they would both contract COVID-18 at work and maintain at least a 6 feet distance from people at work (n=54).

**Supplemental Table 12:** Level of Concern about COVID-19 and Mask Use in Indoor Spaces with Friends/Family (n=231 answered both)

|                                                                               |                      | <i>How likely are you to wear a mask inside a friend's house?</i> |       |                 |      |                  |      | P-Value |
|-------------------------------------------------------------------------------|----------------------|-------------------------------------------------------------------|-------|-----------------|------|------------------|------|---------|
| <i>How concerned are you about giving COVID-19 to your friends or family?</i> |                      | Not at all likely                                                 | %     | Somewhat likely | %    | Extremely likely | %    |         |
|                                                                               | Not at all concerned | 42                                                                | 18.2% | 3               | 1.3% | 6                | 2.6% | 0.02*   |
|                                                                               | A little concerned   | 50                                                                | 21.7% | 5               | 2.2% | 6                | 2.6% |         |
|                                                                               | Somewhat concerned   | 38                                                                | 16.5% | 6               | 2.6% | 7                | 3.0% |         |
|                                                                               | Very concerned       | 41                                                                | 17.8% | 19              | 8.2% | 8                | 3.5% |         |

Percentage is percentage of total table count. \*p<0.05, \*\* p<0.01, \*\*\*p<0.001

Most participants who reported they were a little concerned about giving COVID-19 to their friends or family and not at all likely to wear a mask while inside a friend's house.

About 17% of participants reported they were at least somewhat concerned about giving COVID-19 to their friends and family and at least somewhat likely to wear a mask inside a friend's house (n=40)

**Supplemental Table 13:** Level of Concern about COVID-19 and Social Distancing at Social Gatherings in General (n=230 answered both)

|                                                                               |                      | <i>How likely are you to maintain at least 6 feet distance from people at a gathering?</i> |       |                 |       |                  |      | P-Value   |
|-------------------------------------------------------------------------------|----------------------|--------------------------------------------------------------------------------------------|-------|-----------------|-------|------------------|------|-----------|
| <i>How concerned are you about giving COVID-19 to your friends or family?</i> |                      | Not at all likely                                                                          | %     | Somewhat likely | %     | Extremely likely | %    |           |
|                                                                               | Not at all concerned | 36                                                                                         | 15.7% | 9               | 3.9%  | 4                | 1.7% | <0.001*** |
|                                                                               | A little concerned   | 42                                                                                         | 18.3% | 14              | 6.1%  | 5                | 2.2% |           |
|                                                                               | Somewhat concerned   | 24                                                                                         | 10.4% | 21              | 9.1%  | 7                | 3.0% |           |
|                                                                               | Very concerned       | 20                                                                                         | 8.7%  | 31              | 13.5% | 17               | 7.4% |           |

Percentage is percentage of total table count. \*p<0.05, \*\* p<0.01, \*\*\*p<0.001

Most participants who reported they were a little concerned about giving COVID-19 to their family and friends also reported it was not at all likely they would maintain at least a 6 feet distance from people at a gathering (42, 18,3%)

About 30% of participants reported they were at least somewhat concerned/would be somewhat likely about both giving COVID-19 to their friends and family and maintain at least a 6 feet distance from people at a gathering (n=76).
